# Supplementary material
Source: PubMed Central journal article supplement (PMC9483796)
Supplement: mmc1.pdf [file mmc1.pdf]

iScience, Volume 25

## **Supplemental information**

### **Cystatin C is associated with adverse COVID-19 outcomes in diverse populations**

**Sam O. Kleeman, Mattia Cordioli, Paul R.H. J. Timmers, Atlas Khan, Pinkus Tober-Lau, Florian Kurth, Vadim Demichev, Hannah V. Meyer, James F. Wilson, Markus Ralser, Krzysztof Kiryluk, Andrea Ganna, Kenneth Baillie, and Tobias Janowitz**

## Supplemental material

### Supplemental Figures

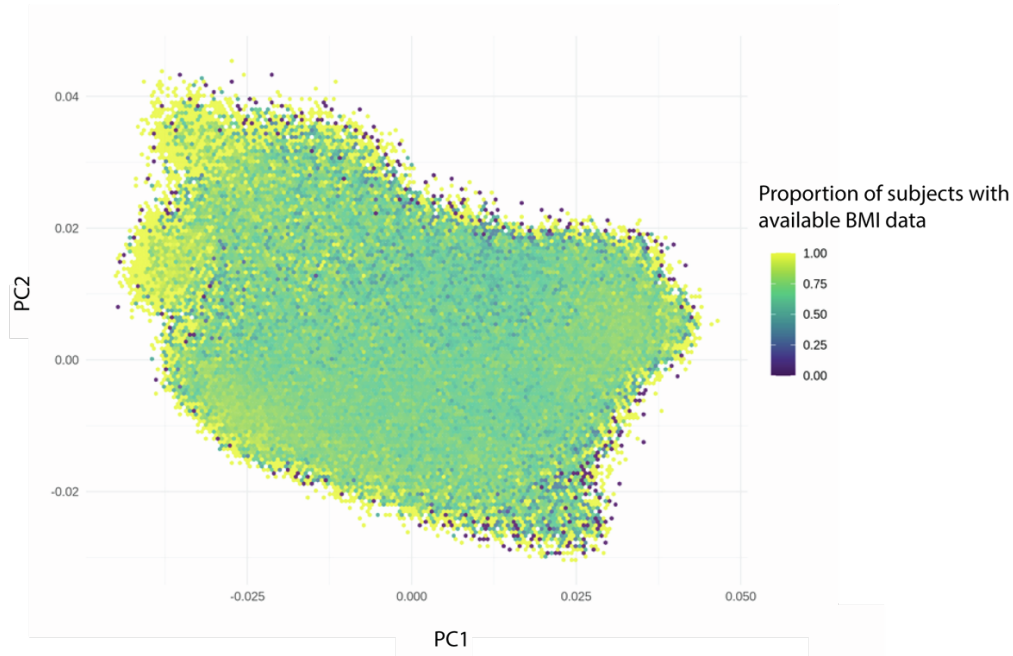

**Figure S1, Related to Figure 1:** Principal component analysis of linkage disequilibrium-pruned directly genotyped SNPs in FinnGen demonstrating no evidence of population stratification between FinnGen participants with BMI recorded versus not recorded. As individual-level PCA coordinates cannot be shared for FinnGen participants, data are displayed as a histogram where the color of each hexagon reflects the proportion of subjects with available BMI data.

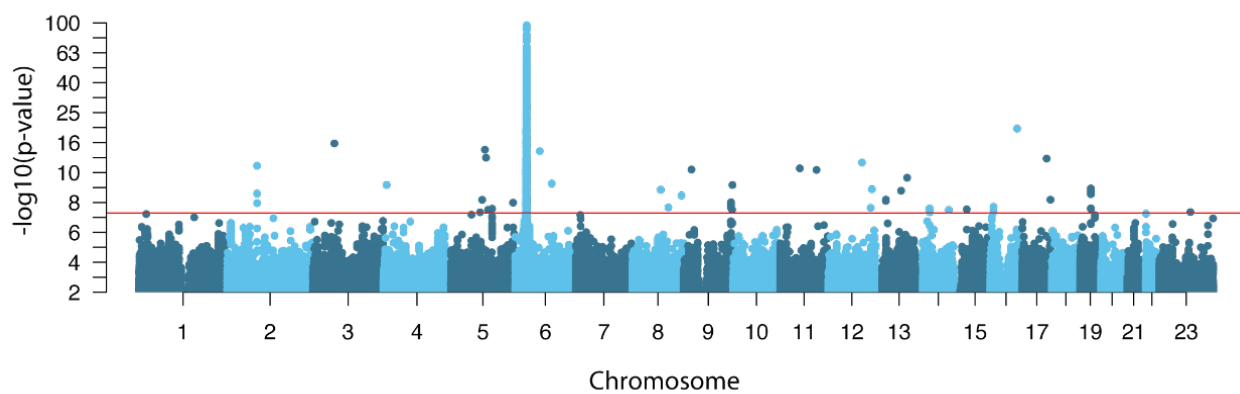

**Figure S2, Related to Figure 1:** Manhattan plot summarizing results of genome-wide association study for GWAS recorded/not recorded in FinnGen.

## Supplemental Tables

**Table S1, Related to Figure 1:** Summary statistics from logistic regression between Z-scored CyC-production PGS in four cohorts (UK Biobank, FinnGen, GenOMICC and Columbia COVID-19 Biobank). Tables summarizes the features of each regression, including case/control cohorts, numbers of cases/controls, patient ancestry, number of SNPs matched between the CyC-production PGS and the relevant cohort, the covariates included in the analysis and the summary statistics for the mild-moderate control and population control analyses. Black cells refer to missing data.

| Non BMI-adjusted analyses |                |              |                  |               |                    |                |          |              |                                                               |                                       | Mild-moderate COVID-19 controls       |                                     |                                        | Population controls                    |                                      |  |
|---------------------------|----------------|--------------|------------------|---------------|--------------------|----------------|----------|--------------|---------------------------------------------------------------|---------------------------------------|---------------------------------------|-------------------------------------|----------------------------------------|----------------------------------------|--------------------------------------|--|
| Case cohort               | Control cohort | n_cases_hosp | n_cases_critical | n_cases_death | n_controls_mildmod | n_controls_pop | Ancestry | Matched SNPs | Covariates                                                    | Hospitalization                       | Critical illness                      | Death                               | Hospitalization                        | Critical illness                       | Death                                |  |
| UKB                       | UKB            | 245          | 43               | 109           | 1513               | 48208          | EUR      | 1031527      | PC1-10, sex, year of birth, recruitment centre,array          | OR 1.21 (95% CI 1.04-1.40), p=0.01297 | OR 2.15 (95% CI 1.55-3.03), p=7.17e-6 | OR 1.16 (95% CI 0.93-1.46), 0.183   | OR 1.24 (95% CI 1.09-1.41), p=0.000766 | OR 2.13 (95% CI 1.58-2.87), p=7.12e-7  | OR 1.20 (95% CI 1.00-1.45), p=0.0529 |  |
| GenOMICC                  | UKB            |              | 2018             |               | 11837              | 318280         | EUR      | 980733       | PC1-10, age, sex, Townsend deprivation index, local authority |                                       | OR 1.16 (95% CI 1.11-1.21), p=4.69e-8 |                                     |                                        | OR 1.20 (95% CI 1.16-1.25), p=2.49e-16 |                                      |  |
| FinnGen                   | FinnGen        | 319          | 165              |               | 2835               | 305996         | EUR      | 1016675      | PC1-4, age, sex                                               | OR 1.09 (95% CI 0.96-1.25), p=0.164   | OR 1.22 (95% CI 1.02-1.46), p=0.0298  |                                     | OR 1.04 (95% CI 0.93-1.16), p=0.538    | OR 1.10 (95% CI 0.94-1.28), p=0.233    |                                      |  |
| Columbia                  | Columbia       | 201          | 93               |               |                    | 2341           | AFR      | 957602       | PC1-3, sex                                                    |                                       |                                       |                                     | OR 1.20 (95% CI 1.05-1.34), p=0.0175   | OR 1.44 (95% CI 1.22-1.65), p=0.000956 |                                      |  |
| Columbia                  | UKB            | 184          | 84               |               |                    | 2334           | AFR      | 957602       | PC1-8, age, sex                                               |                                       |                                       |                                     | OR 1.16 (95% CI 0.98-1.33), p=0.102    | OR 1.31 (95% CI 1.02-1.57), p=0.053    |                                      |  |
| BMI-adjusted analyses     |                |              |                  |               |                    |                |          |              |                                                               |                                       | Mild-moderate COVID-19 controls       |                                     |                                        | Population controls                    |                                      |  |
| Case cohort               | Control cohort | n_cases_hosp | n_cases_critical | n_cases_death | n_controls_mildmod | n_controls_pop | Ancestry | Matched SNPs | Covariates                                                    | Hospitalization                       | ICU admission                         | Death                               | Hospitalization                        | ICU admission                          | Death                                |  |
| UKB                       | UKB            | 245          | 43               | 109           | 1513               | 48208          | EUR      | 1031527      | PC1-10, sex, year of birth, recruitment centre,array, BMI     | OR 1.14 (95% CI 0.98-1.33), p=0.0918  | OR 2.02 (95% CI 1.45-2.85), p=4.17e-5 | OR 1.07 (95% CI 0.86-1.35), p=0.531 | OR 1.15 (95% CI 1.01-1.31), p=0.0277   | OR 1.94 (95% CI 1.44-2.63), p=1.55e-5  | OR 1.12 (95% CI 0.93-1.36), p=0.23   |  |
| FinnGen                   | FinnGen        | 239          | 123              |               | 1939               | 220475         | EUR      | 1016675      | PC1-4, age, sex, BMI                                          | OR 0.99 (95% CI 0.84-1.16), p=0.898   | OR 1.01 (95% CI 0.82-1.25), p=0.163   |                                     | OR 0.97 (95% CI 0.85-1.10), p=0.639    | OR 1.08 (95% CI 0.90-1.29), p=0.397    |                                      |  |
